# Supplementary material for: Ultrafine carbamazepine nanoparticles with enhanced water solubility and rate of dissolution
Source: Royal Society of Chemistry journal article supplement (doi:10.1039/c4ra08495k), 2014-01-01
Supplement: c4ra08495k1.pdf [file c4ra08495k1.pdf]

## Supporting Information

### Ultrafine Carbamazepine nanoparticles with enhanced water solubility and rate of dissolution†

Raj Kumar and Prem Felix Siril\*

School of Basic Sciences, Indian Institute of Technology Mandi, Mandi, India-175001

Correspondence should be addressed to [prem@iitmandi.ac.in](mailto:prem@iitmandi.ac.in)

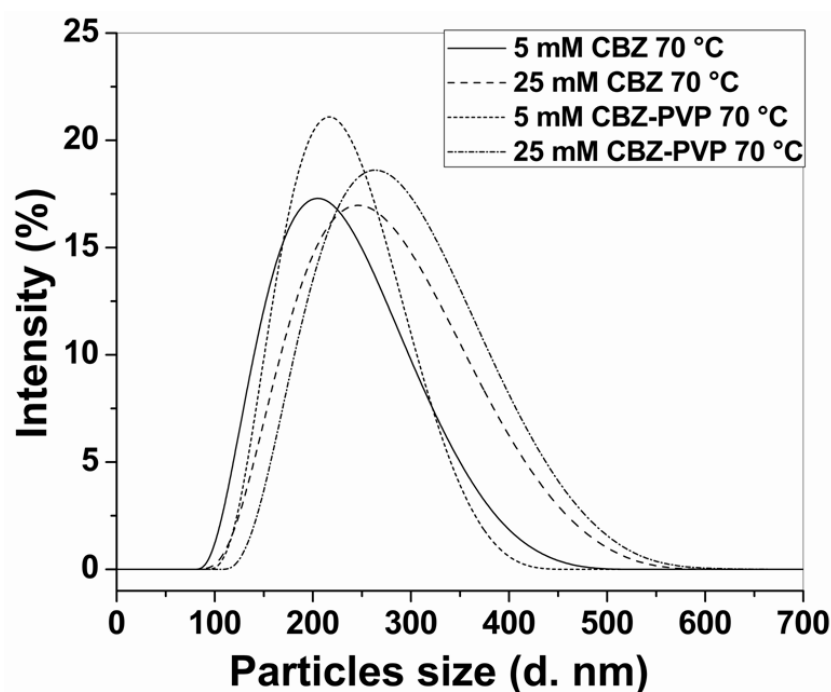

**Figure S1:** Particles size distribution of prepared CBZ nanoparticles in different experimental condition.

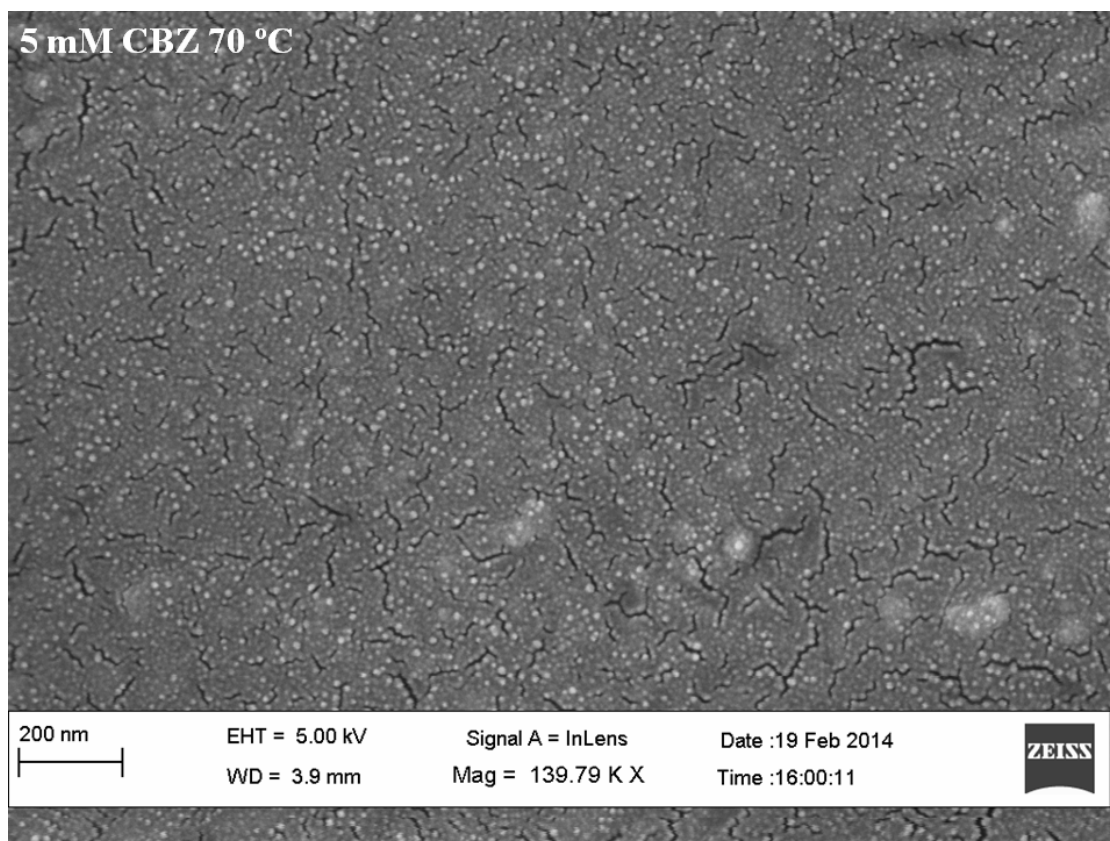

**Figure S2:** FESEM image of CBZ nanoparticles of 5 mM CBZ at 70 °C.

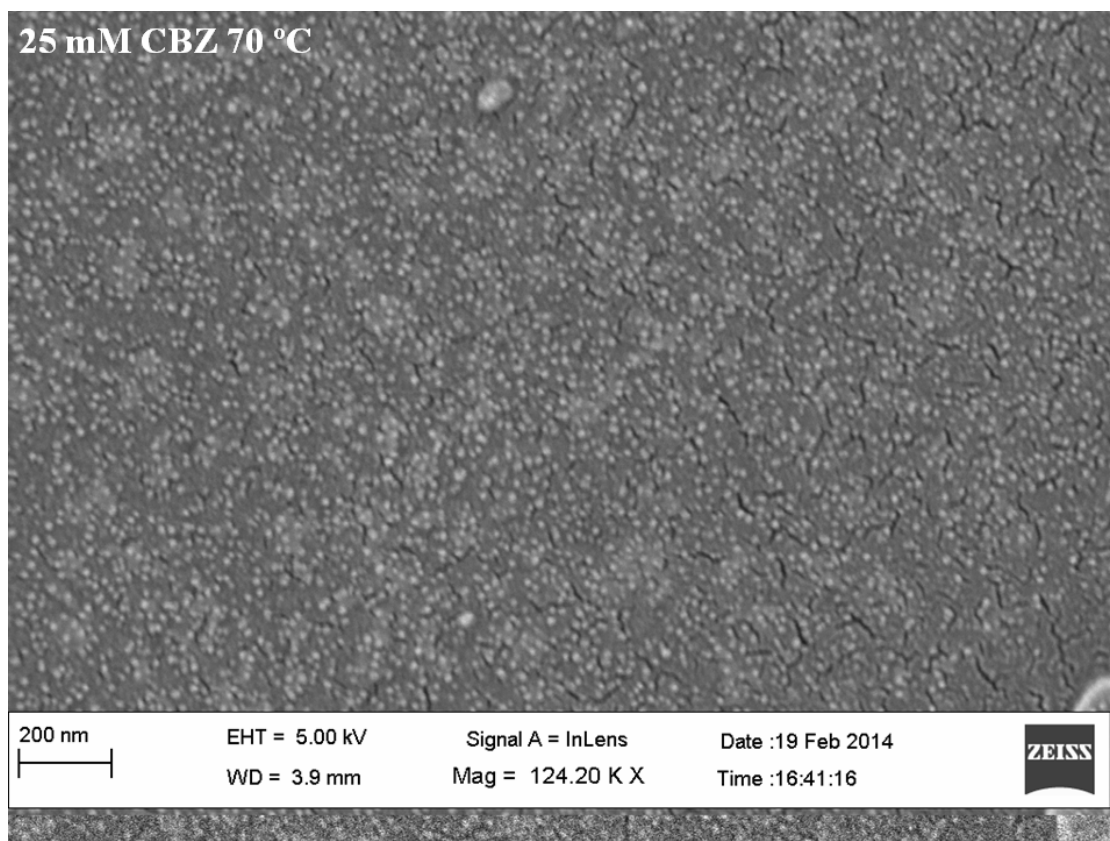

**Figure S3:** FESEM image of CBZ nanoparticles of 25 mM CBZ at 70 °C.

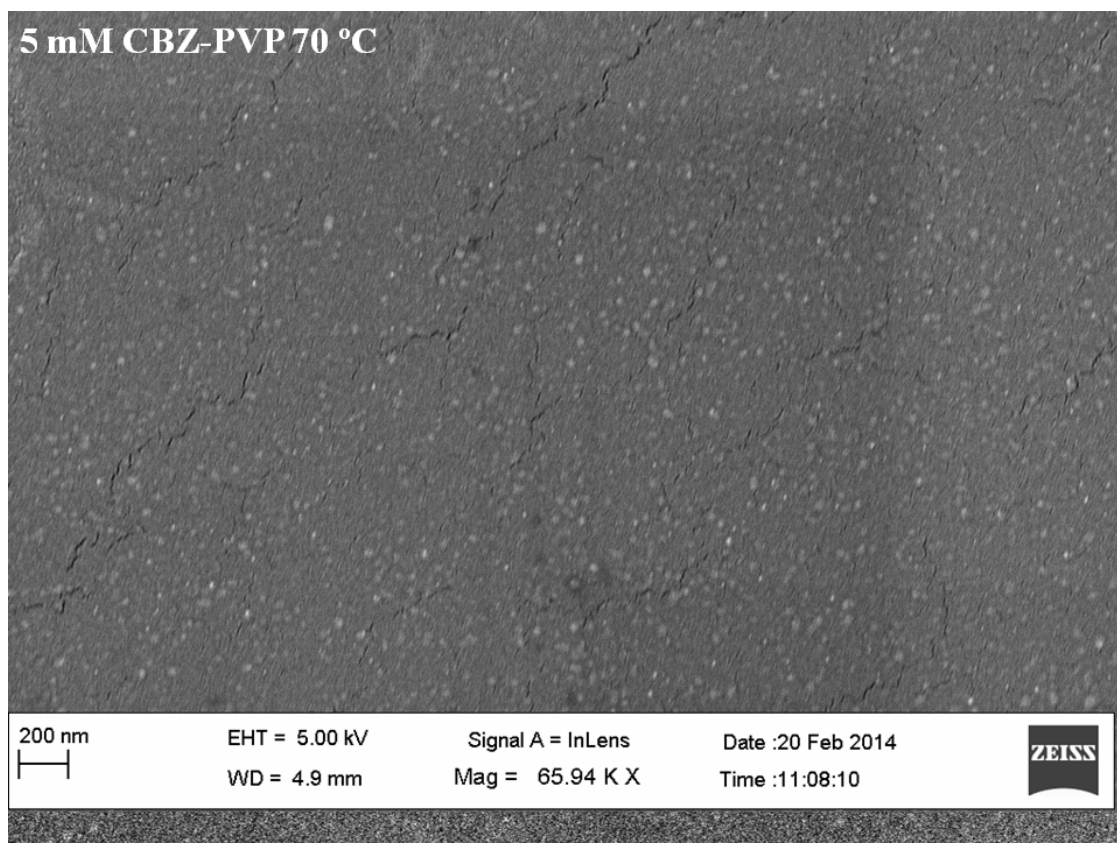

**Figure S4:** FESEM image of CBZ nanoparticles of 5 mM CBZ-PVP at 70 °C.

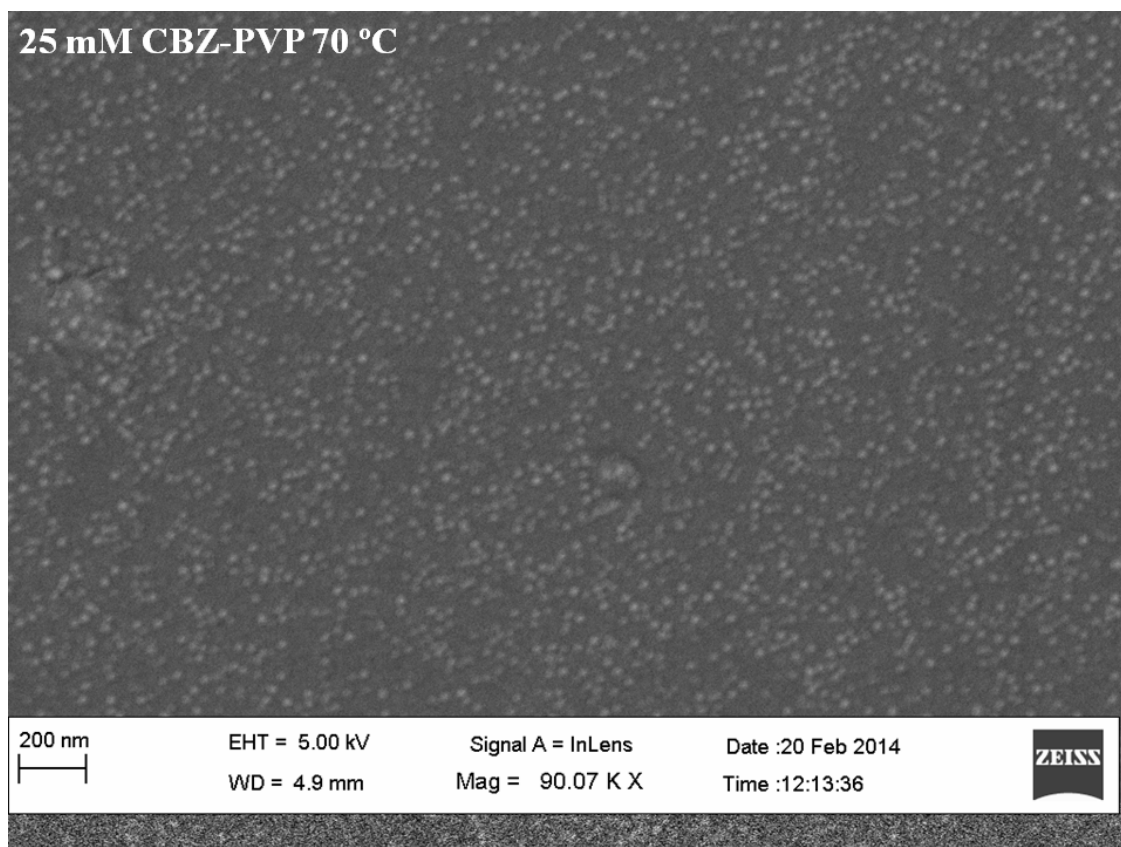

**Figure S5:** FESEM image of CBZ nanoparticles of 25 mM CBZ-PVP at 70 °C.

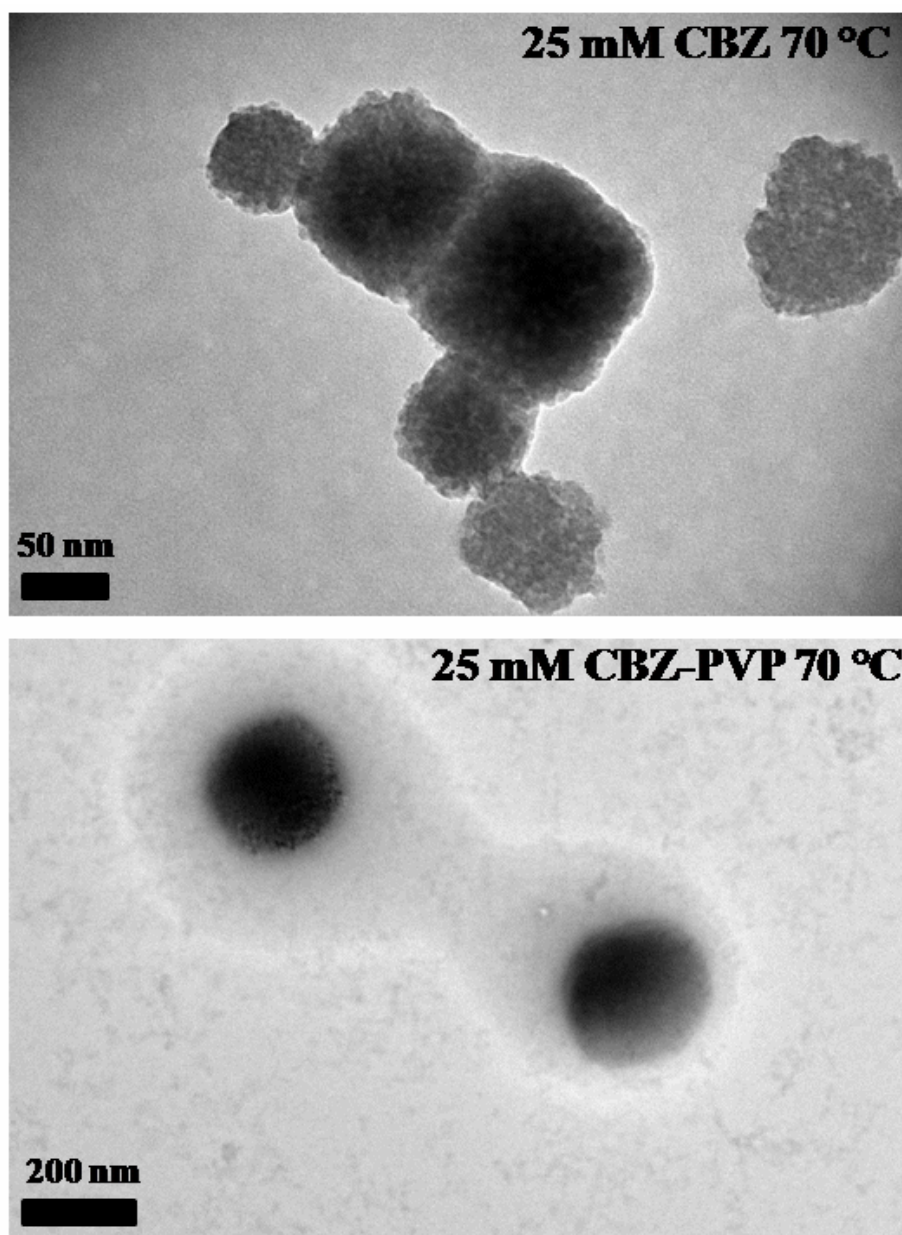

**Figure S6:** TEM images of CBZ nanoparticles and CBZ-PVP nanoparticles showing a dark corona and lighter surface.

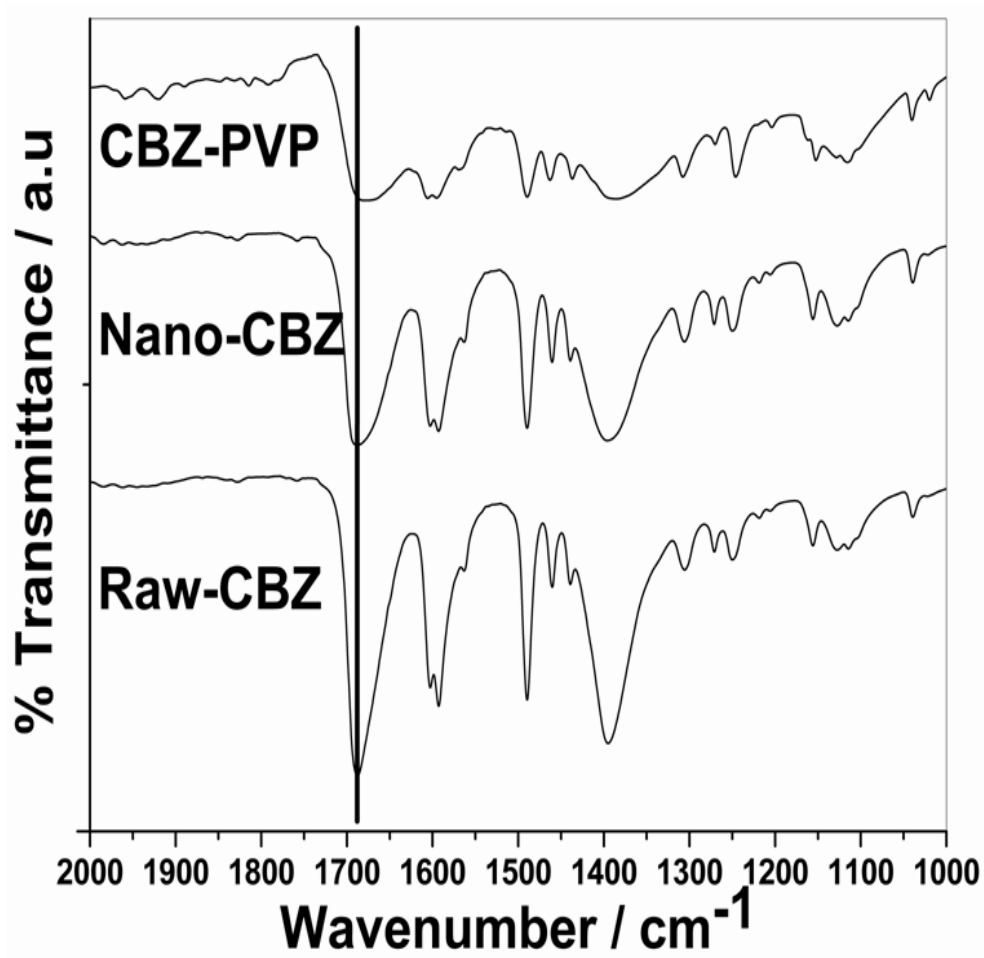

**Figure S7:** FTIR spectra of raw-CBZ, nano-CBZ and CBZ-PVP showing peak shift.
